# Supplementary material for: Integrative dynamic structural biology unveils conformers essential for the oligomerization of a large GTPase
Source: eLife journal article supplement (doi:10.7554/elife.79565), 2023-06-14

**A**MD simulations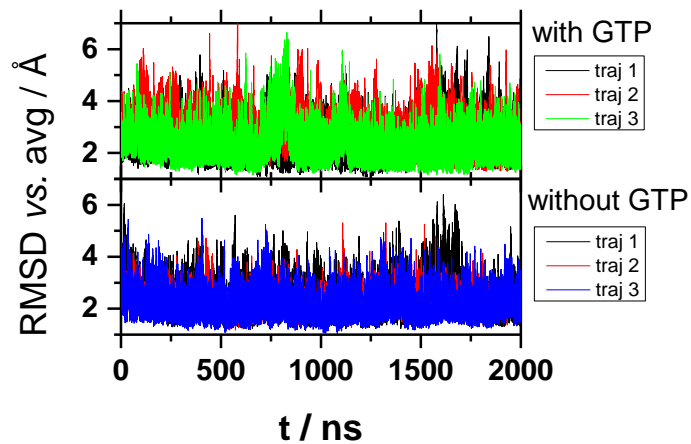**B**Correlation analysis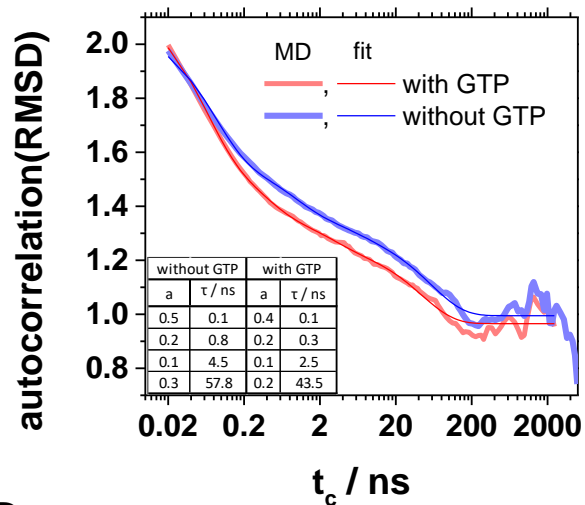**C**Conformational space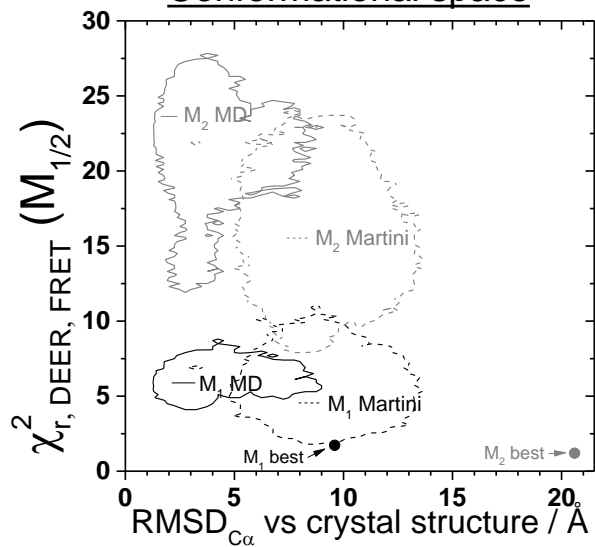**D**Identification of flexible regions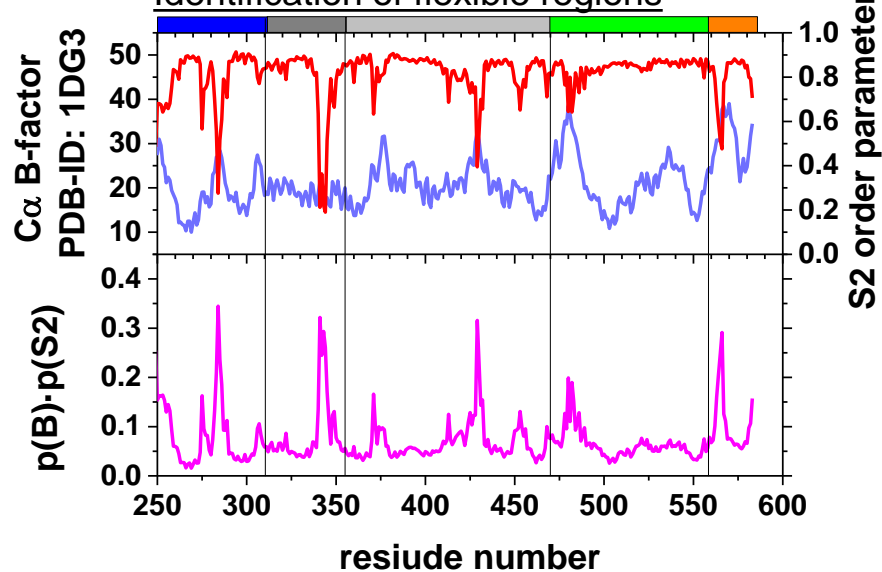**E**Ensemble selection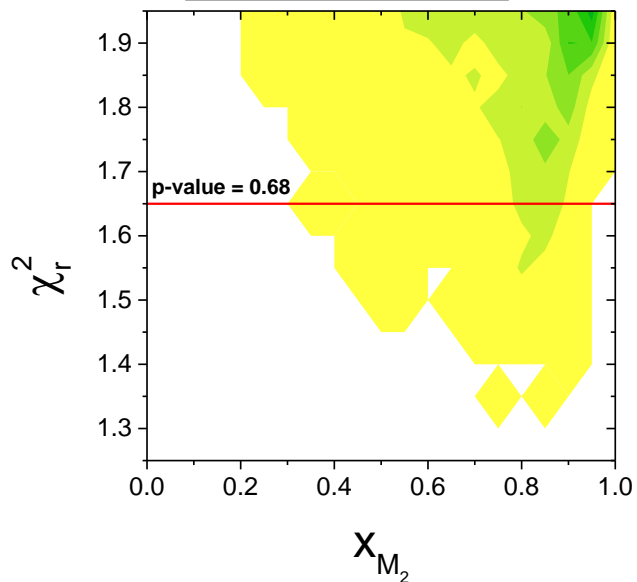

Supplement: supp [file elife-79565-supp-v1.zip]
