# Supplementary material for: Integrative dynamic structural biology unveils conformers essential for the oligomerization of a large GTPase
Source: eLife journal article supplement (doi:10.7554/elife.79565), 2023-06-14

**A****LP: Monomer****N18C/Q540C**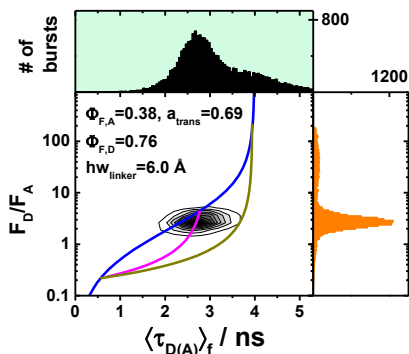**Q254C/Q540C**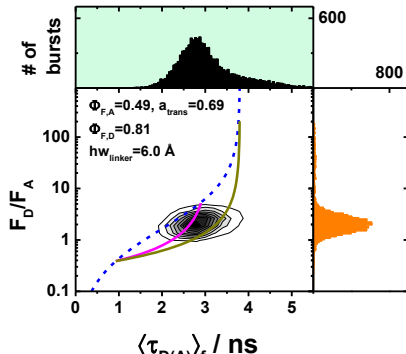**N18C/Q577C**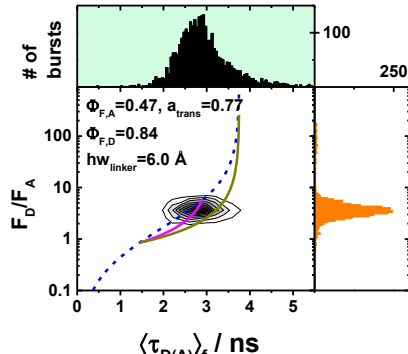**Dimer: LP + 10μM UP + 100 μM GDP-AIFx**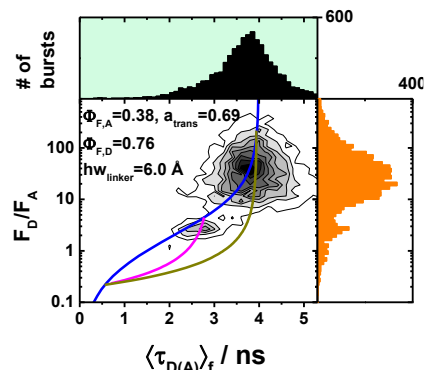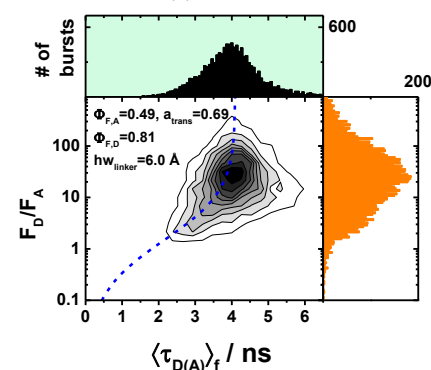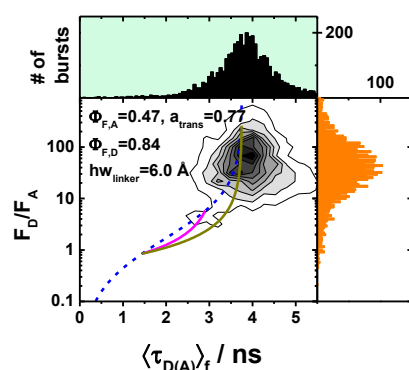**B****N18C/Q577C**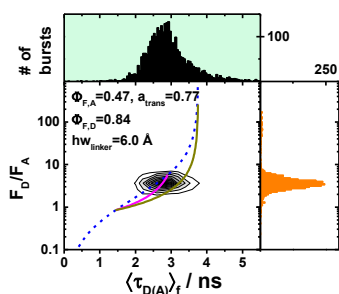**N18C/Q577C + 300 μM GTP**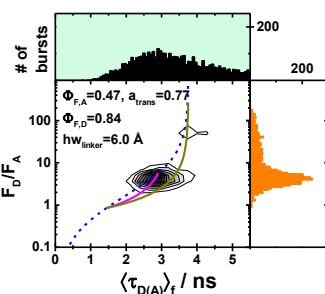**N18C/Q577C + 100 μM GDP-AIFx**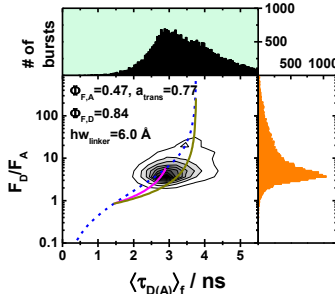**N18C/Q577C + 300 μM GTP + 10 μM UP**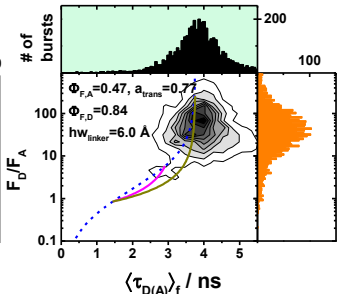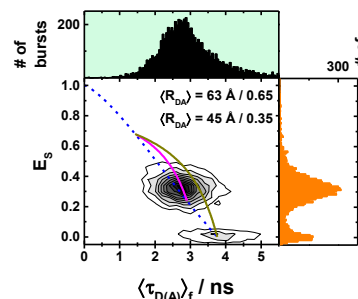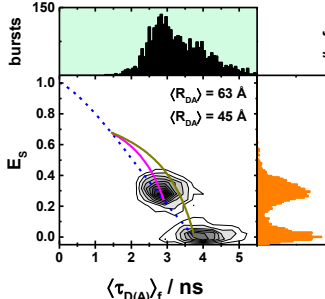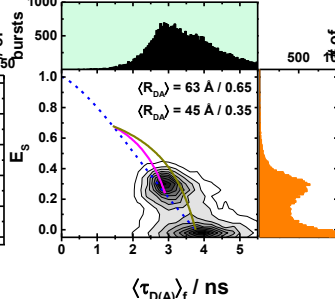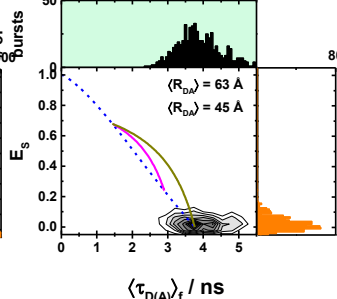

Supplement: supp [file elife-79565-supp-v1.zip]
