# Supplementary material for: Integrative dynamic structural biology unveils conformers essential for the oligomerization of a large GTPase
Source: eLife journal article supplement (doi:10.7554/elife.79565), 2023-06-14
Supplement: supp [file elife-79565-supp-v1.zip]

Oligomerization state      Method      Domain arrangement

Structure models

|          |                                            |                   |                                                                                                                                     |                                                                                                                                                                                                  |
|----------|--------------------------------------------|-------------------|-------------------------------------------------------------------------------------------------------------------------------------|--------------------------------------------------------------------------------------------------------------------------------------------------------------------------------------------------|
| <b>A</b> | <b>Monomer</b><br>hGBP1                    | <u>X-Ray</u>      | 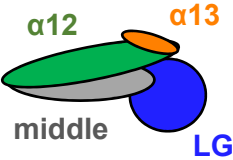                                                   | <br>PDB-ID:<br>1DG3                                                                                            |
| <b>B</b> | <b>Dimer</b><br>hGBP1<br>+ nucleotide      | <u>X-Ray</u>      |                                                    | <br>PDB-ID:<br>1F5N (+GppNHp), 2BC9 (+GppNHp),<br>2B92 (+GDP-AIF <sub>3</sub> ), 2B8W (+GMP-AIF <sub>4</sub> ) |
| <b>C</b> | <b>Dimer</b><br>hGBP1<br>+ GppNHp          | <u>FRET, DEER</u> | <br>Population: 10%                                | <br>Population: 90%                                                                                            |
| <b>D</b> | <b>Monomer</b><br>farn-hGBP1               | <u>X-Ray</u>      |                                                    | <br>PDB-ID:<br>6K1Z<br>RMSD to 1DG3: 1.4 Å                                                                     |
| <b>E</b> | <b>Monomer</b><br>farn-hGBP1               | <u>SAXS</u>       | <br>SASBDB-ID:<br>SASDEE8<br>RMSD to 1DG3: 8.7 Å |                                                                                                                                                                                                  |
| <b>F</b> | <b>Dimer</b><br>farn-hGBP1<br>+ nucleotide | <u>SAXS</u>       | <br>SASBDB-ID:<br>SASDEG8 (+GppNHp)              | <br>SASBDB:<br>SASDEJ8 (+GppNHp)                                                                             |
