# Supplementary material for: Integrative dynamic structural biology unveils conformers essential for the oligomerization of a large GTPase
Source: eLife journal article supplement (doi:10.7554/elife.79565), 2023-06-14

## A Protein activity measurements

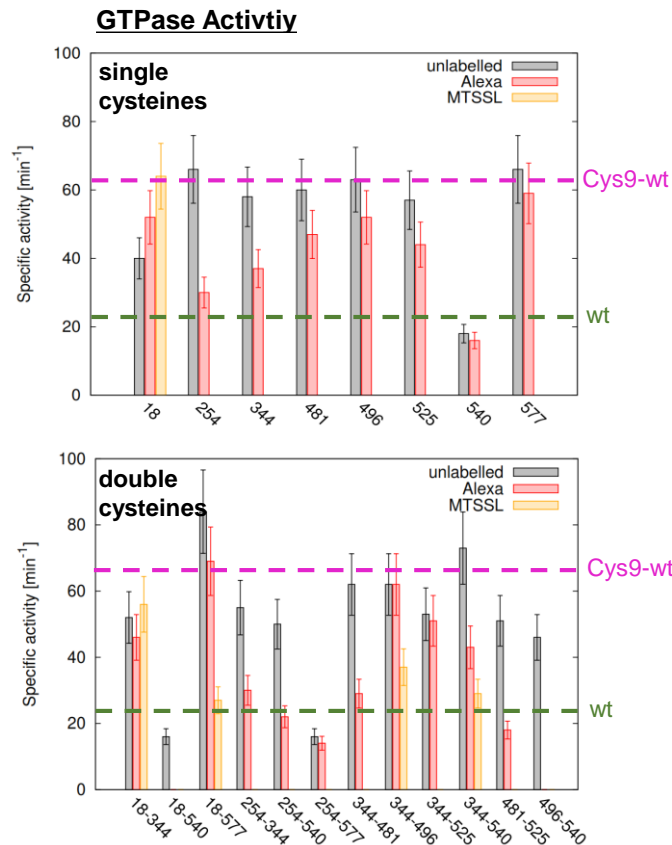

## Oligomerization

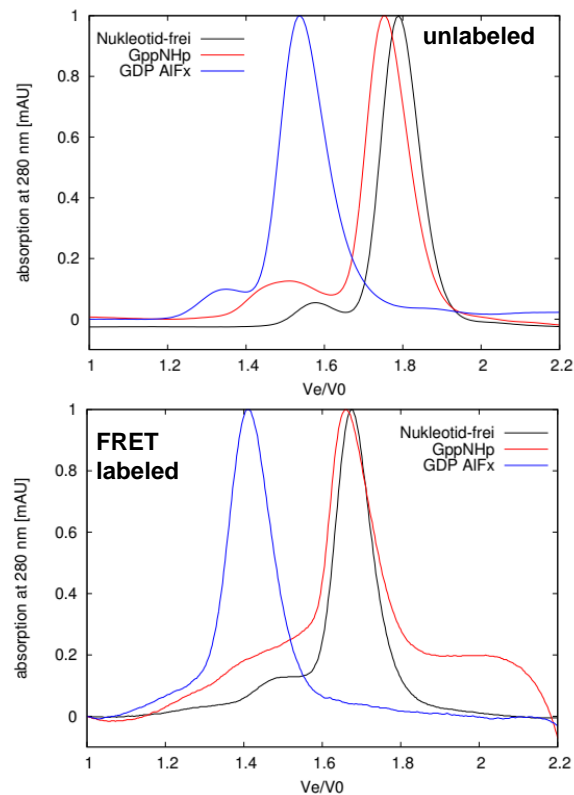

## B Dye model consistency

### Rotational diffusion: Fluorescence anisotropy

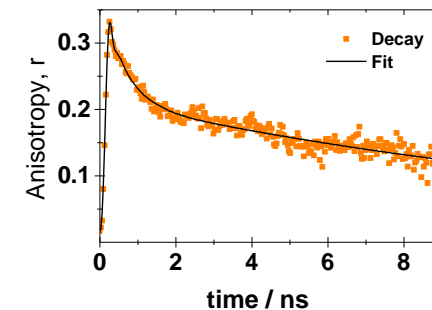

### Translational diffusion: Donor quenching

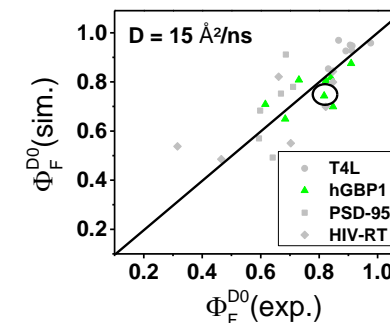

## C Temperature dependency

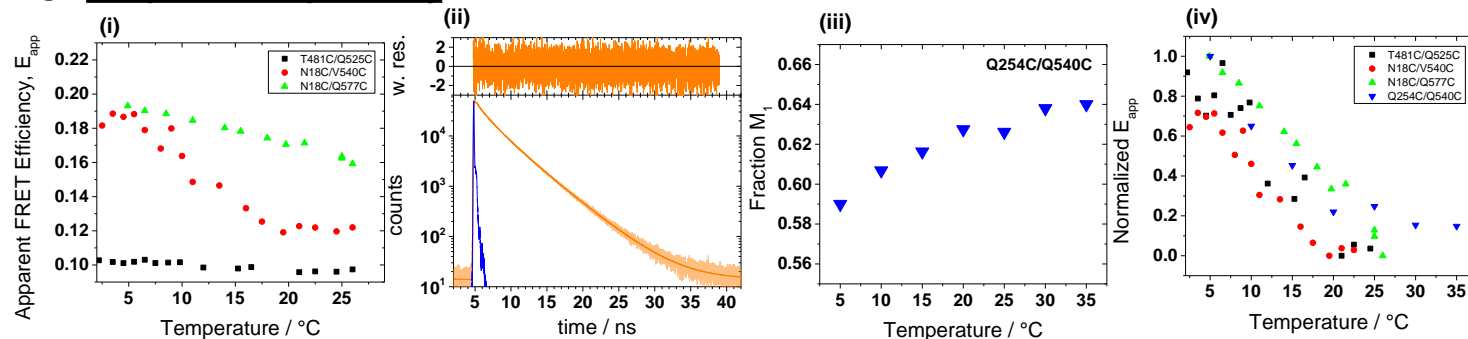

## D Assignment consistency

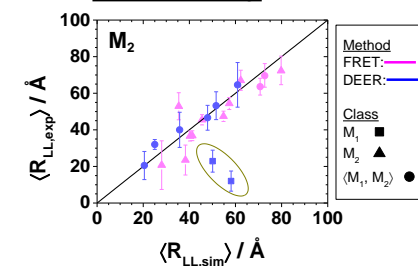

Supplement: supp [file elife-79565-supp-v1.zip]
