# Supplementary figures and images for: Integrative dynamic structural biology unveils conformers essential for the oligomerization of a large GTPase
Source: eLife journal article supplement (doi:10.7554/elife.79565), 2023-06-14

**A**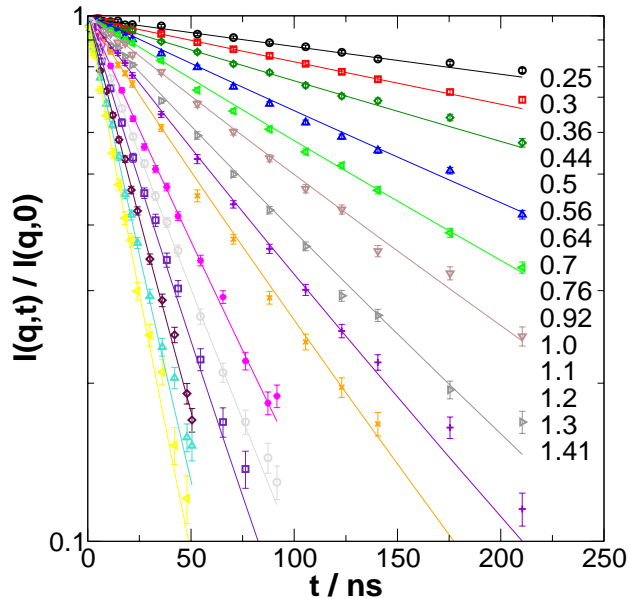**B**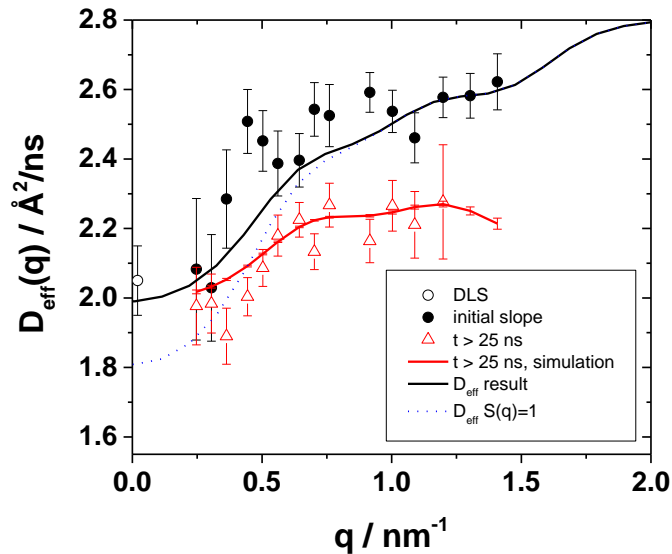

Supplement: supp [file elife-79565-supp-v1.zip]

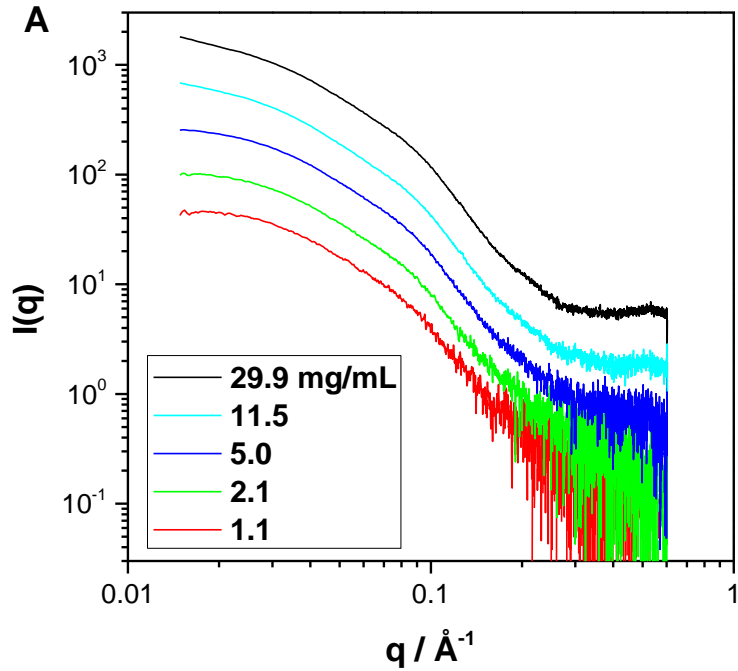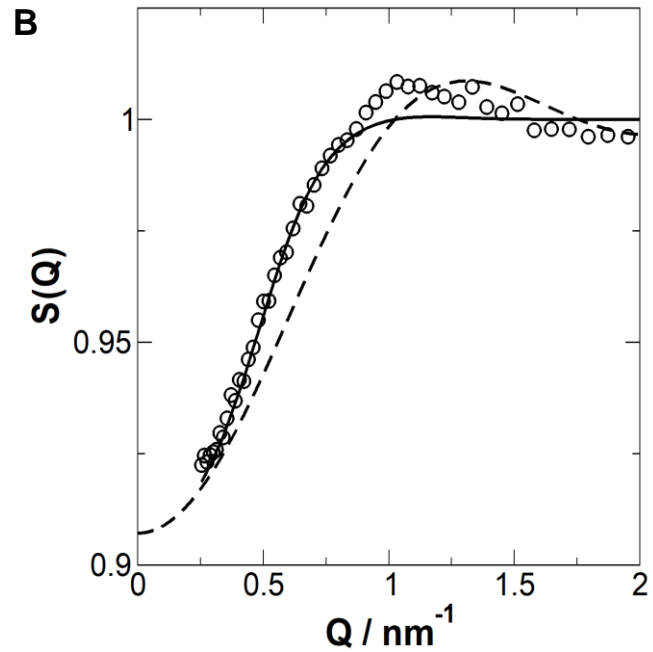

Supplement: supp [file elife-79565-supp-v1.zip]

## A Stability analysis

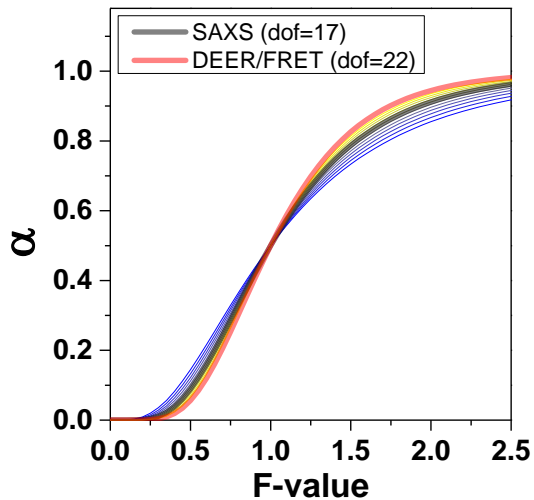

## B Significance analysis

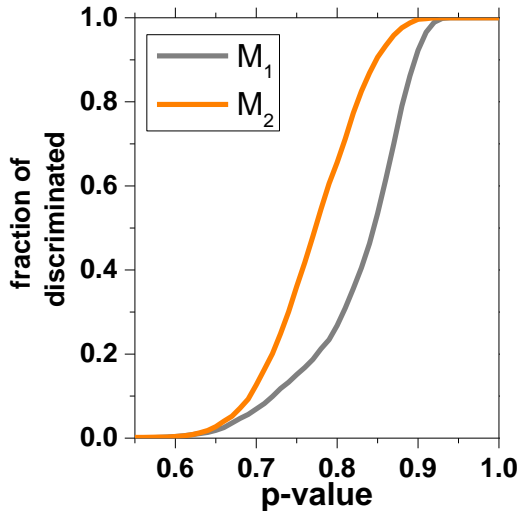

Supplement: supp [file elife-79565-supp-v1.zip]

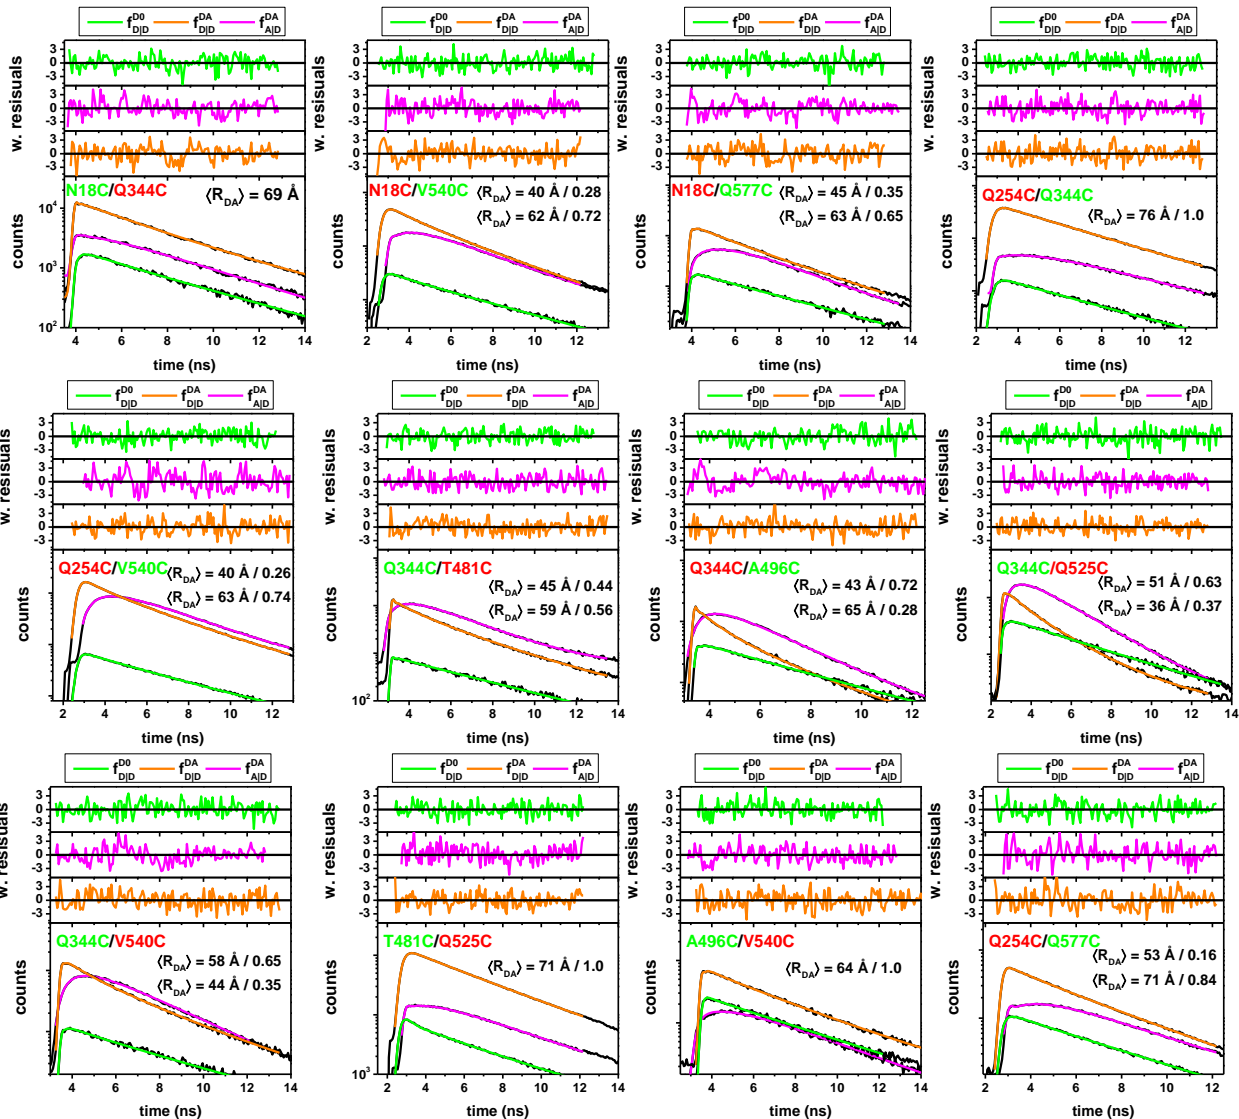

Supplement: supp [file elife-79565-supp-v1.zip]

**A**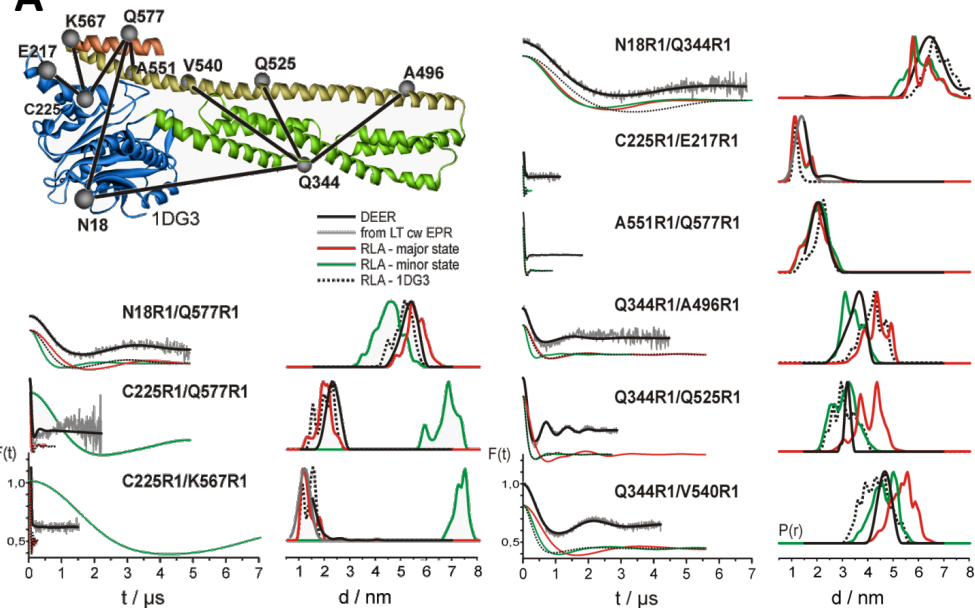**B**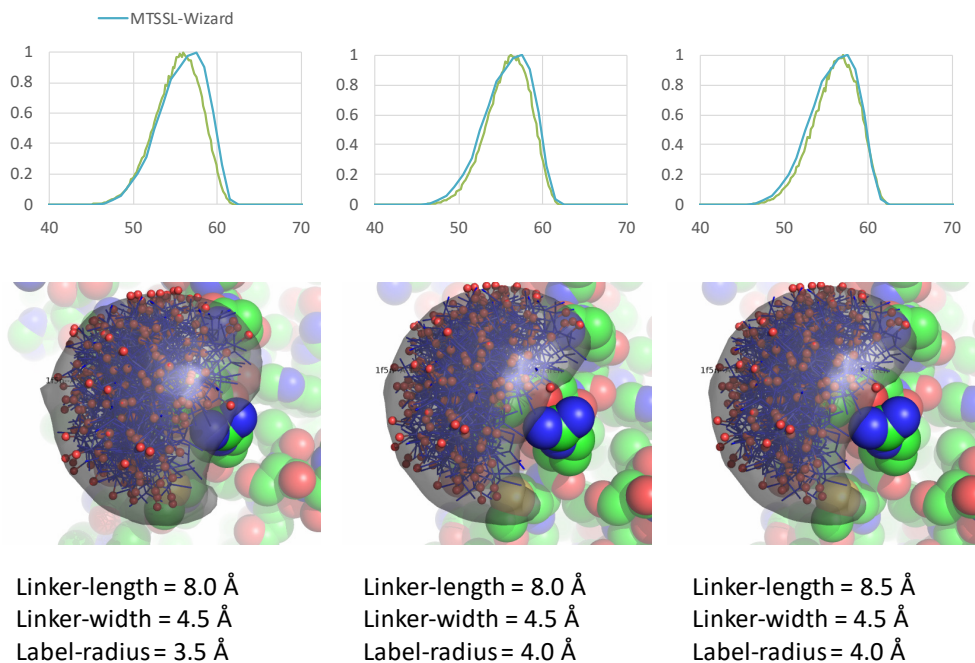

Supplement: supp [file elife-79565-supp-v1.zip]

**M<sub>1</sub>**

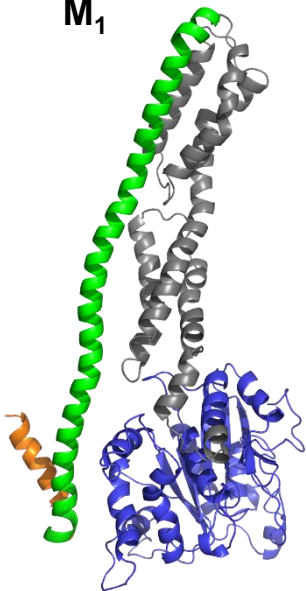

**M<sub>2</sub>**

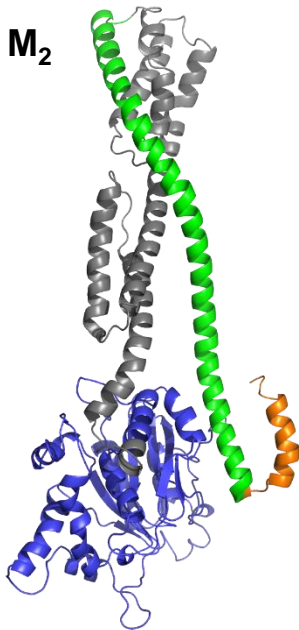

Supplement: supp [file elife-79565-supp-v1.zip]

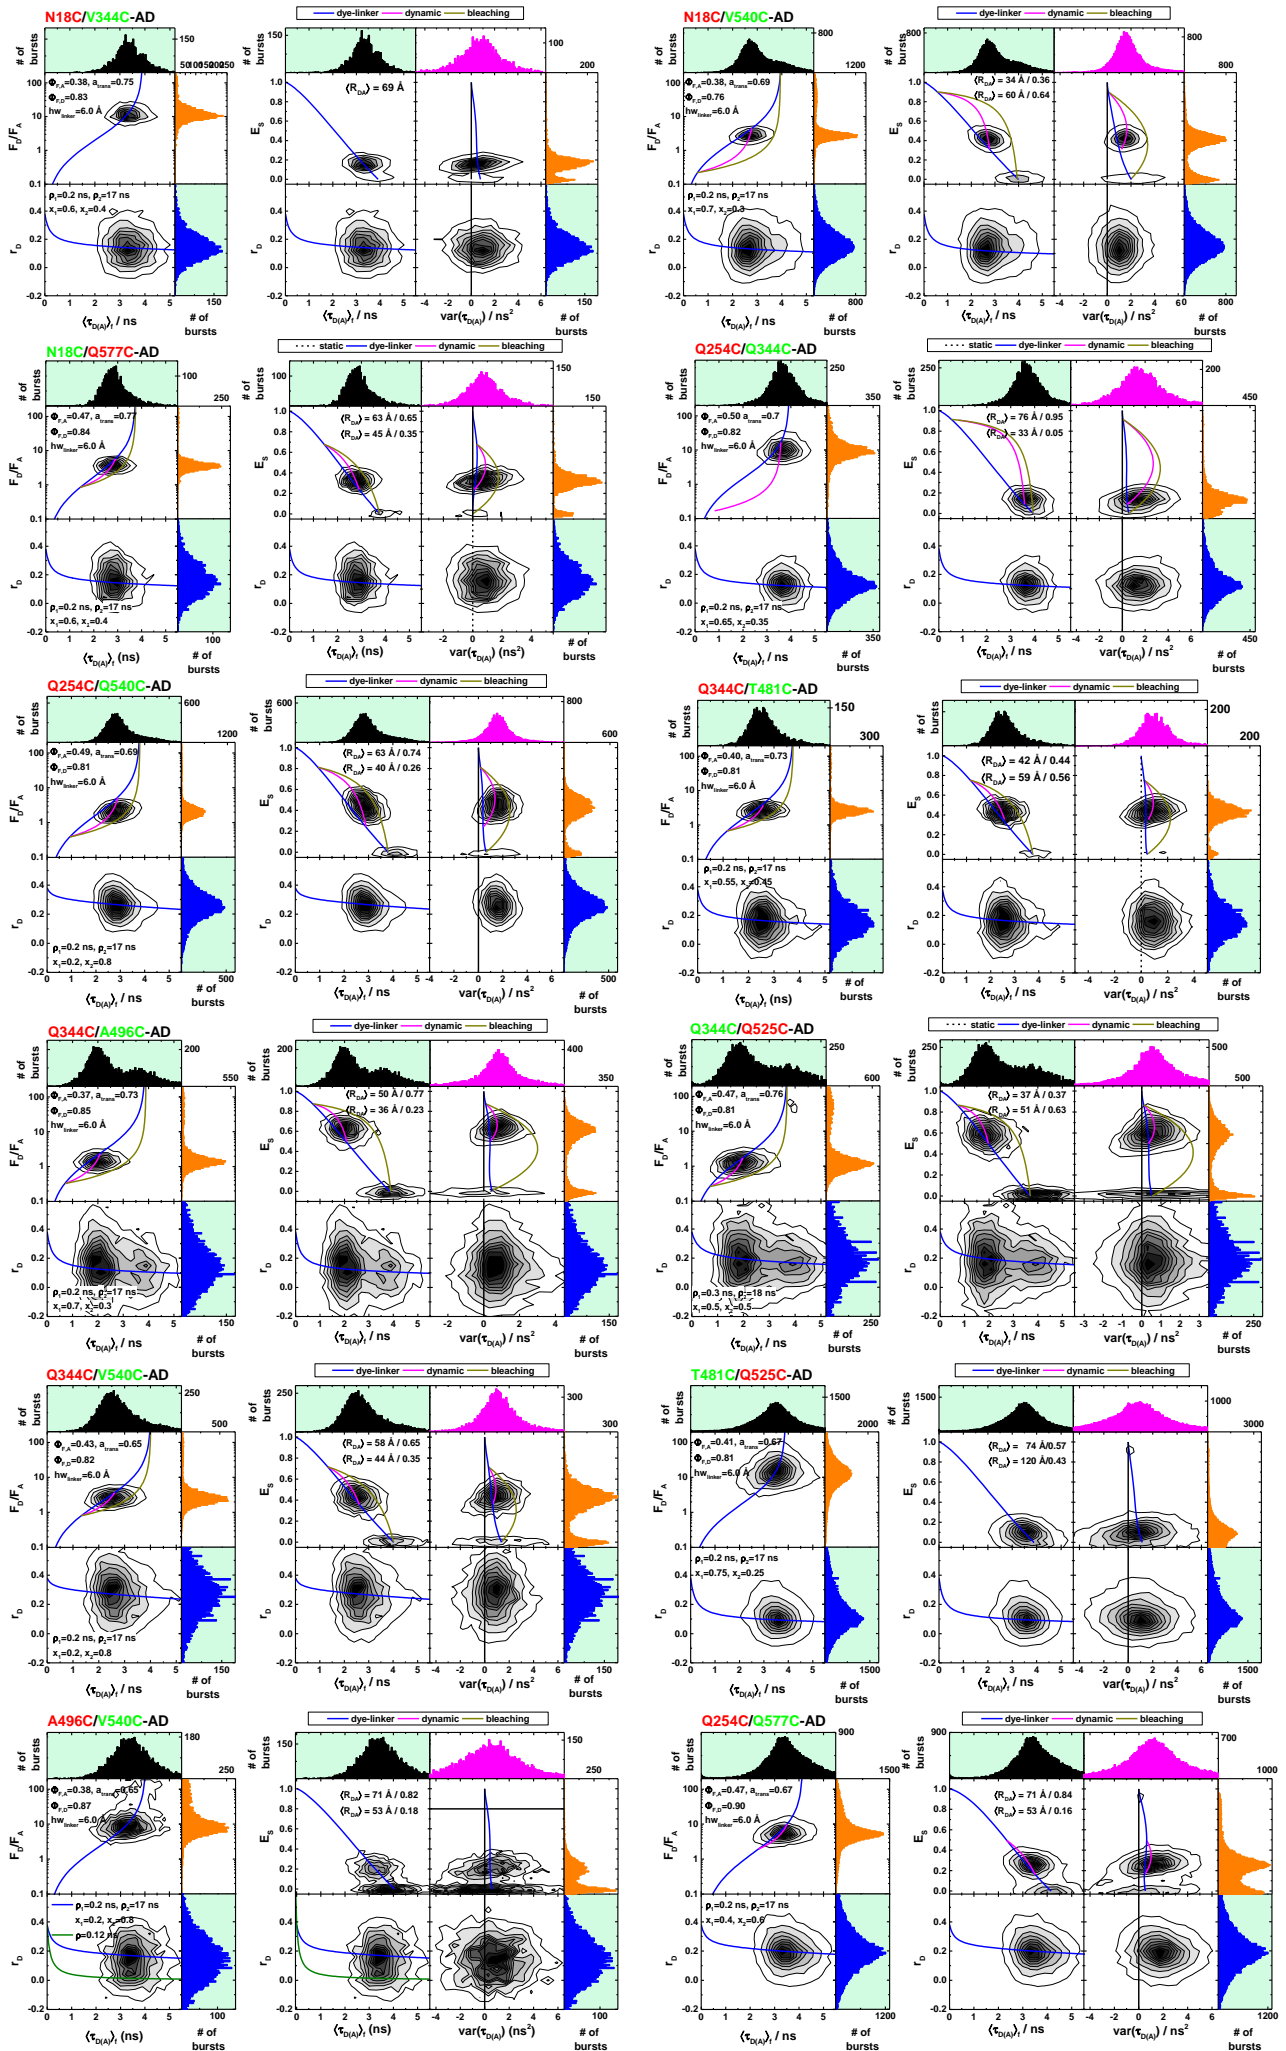

Supplement: supp [file elife-79565-supp-v1.zip]

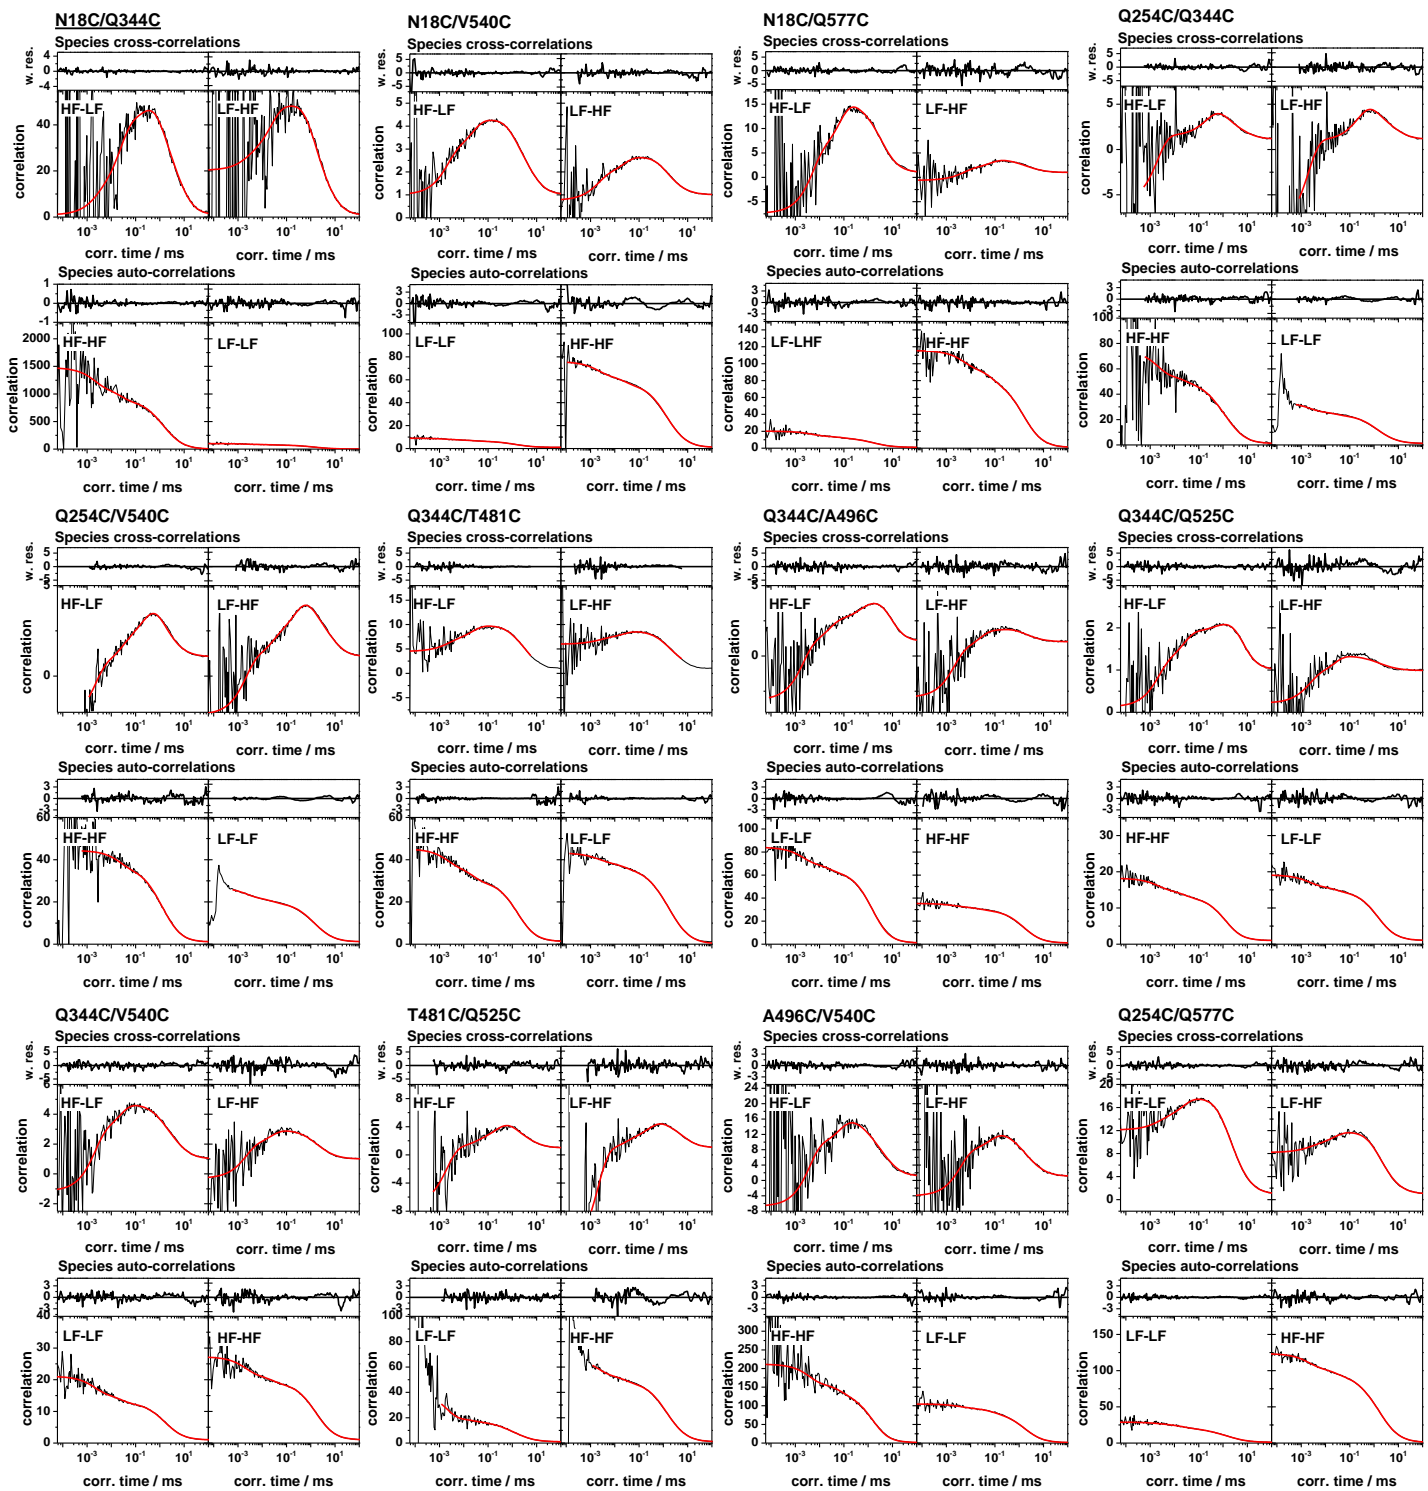

Supplement: supp [file elife-79565-supp-v1.zip]
